# Supplementary material for: Spatial organization of the transcriptional regulatory network of Saccharomyces cerevisiae
Source: bioRxiv preprint, doi:10.1101/509224, version 1 (2019-01-02)
Supplement: Supplementary Data [file 509224_file03.xlsx]

## Sheet: The yeast TRN
TF	TG	Direction	Distance
YLR403W	YLR048W	+	118.474
YDR423C	YKL002W	-	129.335
YMR021C	YDL234C	-	66.365
YLR403W	YDR050C	?	156.673
YDR253C	YLR438W	bound	109.636
YIL101C	YGR055W	binding enriched	46.579
YLR071C	YLL050C	binding enriched	35.488
YDR397C	YHR161C	binding enriched	119.442
YDR310C	YPL130W	-	57.133
YPL254W	YHR141C	+	37.844
YPR104C	YPL250C	binding enriched	50.002
YLR403W	YDL031W	?	153.807
YOR110W	YFL034W	binding enriched	86.332
YOL148C	YPL238C	+	118.633
YIL101C	YCR079W	binding enriched	39.797
YLR403W	YDR141C	?	129.07
YDL170W	YMR067C	binding enriched	48.799
YBR049C	YGL106W	binding enriched	83.306
YGR252W	YOR322C	binding enriched	62.183
YLR403W	YDR139C	-	130.582
YKL032C	YPL227C	+	106.962
YBR112C	YER092W	binding enriched	68.362
YDL005C	YBR082C	binding enriched	72.25
YMR164C	YIL011W	?	109.069
YDR259C	YER093C	binding enriched	76.714
YLR176C	YBR217W	binding enriched	65.736
YDR259C	YLR005W	binding enriched	125.651
YNL216W	YDR036C	binding enriched	74.362
YLR403W	YGR094W	+	88.331
YDL005C	YFR050C	binding enriched	30.134
YNL103W	YML107C	?	84.52
YER159C	YAL061W	binding enriched	90.266
YPL248C	YML100W	+	41.715
YPR086W	YNL160W	binding enriched	82.82
YDL005C	YDL160C-A	binding enriched	97.093
YDR259C	YOL125W	binding enriched	77.493
YBR049C	YOR275C	binding enriched	115.893
YIL101C	YBR010W	binding enriched	50.238
YIL101C	YJR046W	binding enriched	59.318
YPR052C	YGR205W	binding enriched	77.016
YOL148C	YJR015W	+	57.353
YBR049C	YKL203C	binding enriched	92.724
YNL330C	YMR135C	binding enriched	93.027
YNL216W	YLR060W	binding enriched	75.787
YDL005C	YER092W	binding enriched	79.986
YDR423C	YNL308C	-	50.177
YNL216W	YOL158C	binding enriched	31.132
YIL131C	YOR179C	binding enriched	73.523
YMR037C	YBR068C	binding enriched	68.544
YDL005C	YER076C	binding enriched	92.183
YIL101C	YJR011C	binding enriched	64.497
YJL127C	YLR445W	?	138.594
YPL075W	YPR004C	+	62.021
YNL216W	YPL174C	-	75.328
YLR223C	YOR234C	bound	137.768
YGR252W	YFR044C	binding enriched	110.263
YDR259C	YIR002C	binding enriched	134.908
YER040W	YHL020C	binding enriched	67.333
YBR049C	YMR292W	binding enriched	63.461
YNL216W	YPR161C	binding enriched	71.818
YLR403W	YLR222C	?	29.565
YOL108C	YHR025W	binding enriched	88.486
YOR174W	YGR274C	binding enriched	84.495
YER040W	YOR032C	binding enriched	46.884
YBR049C	YFL016C	binding enriched	72.3
YDL005C	YIL113W	binding enriched	68.737
YLR071C	YOL119C	binding enriched	91.272
YGR252W	YCL026C-B	binding enriched	100.712
YKR099W	YJR148W	+	60.41
YIL101C	YIL148W	binding enriched	28.543
YIL131C	YER187W	binding enriched	43.592
YIL101C	YPL244C	binding enriched	70.173
YLR071C	YDR197W	binding enriched	120.317
YGR252W	YKL209C	binding enriched	78.946
YPL075W	YKL004W	+	72.914
YEL009C	YEL009C	?	0
YOL148C	YDL083C	+	81.084
YPL075W	YMR107W	-	26.98
YPL254W	YOR385W	+	82.816
YNL236W	YHR219W	+	137.583
YBR112C	YMR120C	binding enriched	60.597
YNL236W	YKL191W	+	44.379
YNL103W	YOL052C-A	?	55.737
YCL058W-A	YGR082W	binding enriched	56.163
YLR176C	YBR069C	binding enriched	93.49
YKL185W	YNR045W	binding enriched	93.724
YIL131C	YAR019C	binding enriched	85.378
YHR084W	YLR120C	+	70.729
YOR110W	YBR216C	binding enriched	108.078
YIL101C	YER074W-A	binding enriched	38.848
YDR443C	YML100W	-	70.587
YOR174W	YGL112C	binding enriched	81.435
YJL127C	YGL064C	?	50.369
YHR058C	YOR007C	binding enriched	83.288
YIL101C	YOR244W	binding enriched	73.339
YIR018W	YJR120W	?	66.386
YNL216W	YDR343C	binding enriched	78.513
YJL127C	YHR203C	+	87.269
YBR083W	YAR009C	+	100.53
YBR049C	YDR050C	binding enriched	65.705
YDR392W	YJR028W	+	120.339
YHL020C	YHR018C	-	10.856
YPR086W	YDL110C	binding enriched	39.657
YLR098C	YLR157W-E	binding enriched	73.357
YDR259C	YJL034W	binding enriched	109.981
YIL101C	YJR059W	binding enriched	55.722
YNL103W	YMR037C	?	99.046
YIL131C	YGR013W	binding enriched	51.578
YEL009C	YLR279W	?	167.781
YDR448W	YGL062W	binding enriched	96.24
YPL075W	YKL096W-A	+	75.332
YDR207C	YER064C	binding enriched	108.807
YGR252W	YBR070C	binding enriched	51.969
YLR451W	YER157W	binding enriched	92.631
YDR259C	YOR141C	+	65.732
YDR392W	YMR027W	binding enriched	101.686
YBR083W	YHR152W	+	20.24
YOR028C	YLR266C	binding enriched	168.561
YDR310C	YNL318C	-	75.566
YDR207C	YER056C	binding enriched	105.968
YGR252W	YDL080C	binding enriched	92.557
YIL101C	YKR058W	binding enriched	78.026
YPR133C	YDR155C	binding enriched	36.506
YNL236W	YOR321W	+	45.978
YML007W	YIR017C	binding enriched	28.074
YGL073W	YIL117C	+	23.345
YOR110W	YFR049W	binding enriched	67.525
YNL257C	YCR021C	+	109.642
YCR084C	YPL231W	+	70.476
YBR081C	YPR154W	binding enriched	81.447
YOR344C	YIL082W	+	91.17
YNL216W	YCL040W	+	97.617
YBR240C	YOL078W	-	95.399
YGL073W	YGR155W	+	44.505
YPR086W	YOL155C	binding enriched	104.052
YIR018W	YOR178C	?	113.076
YER159C	YMR090W	binding enriched	86.401
YLR403W	YOR071C	-	161.093
YER111C	YNL320W	binding enriched	71.138
YDR169C	YNL242W	+	89.848
YDL005C	YNR037C	binding enriched	58.831
YLR403W	YCR072C	?	125.423
YOR110W	YJL143W	binding enriched	67.796
YML007W	YLR097C	binding enriched	70.346
YDR423C	YML052W	+	102.432
YLR403W	YDL052C	?	156.783
YNL236W	YKL080W	+	47.045
YCR084C	YGR161C	binding enriched	60.395
YDL005C	YOR394C-A	binding enriched	132.743
YKR099W	YBL005W-B	-	66.778
YIL101C	YJR005C-A	binding enriched	61.25
YOL148C	YJR028W	+	46.172
YGL073W	YGR250C	+	47.207
YDR259C	YFR023W	binding enriched	124.853
YDL170W	YGR075C	binding enriched	120.784
YML007W	YNL237W	-	98.215
YGL071W	YGL055W	-	12.574
YDL170W	YBR221W-A	binding enriched	98.387
YDL005C	YIL145C	binding enriched	76.446
YGR252W	YAL025C	binding enriched	112.001
YDR463W	YLR162W	-	118.291
YIL131C	YLR247C	binding enriched	100.377
YCR084C	YDR385W	+	111
YNL216W	YMR186W	+	94.173
YLR403W	YMR077C	-	150.466
YOR028C	YDL175C	+	63.458
YCR084C	YJR147W	+	79.896
YLR403W	YDR064W	+	159.523
YER040W	YKL170W	binding enriched	67.598
YOL148C	YDL136W	+	71.727
YDR259C	YPL098C	binding enriched	67.759
YML007W	YBR188C	binding enriched	103.581
YOR032C	YOR160W	+	70.284
YKR099W	YCL030C	+	68.175
YDL170W	YIL052C	binding enriched	118.154
YDR392W	YDR173C	binding enriched	53.887
YIR018W	YPL192C	?	101.754
YIR018W	YHR136C	-	86.667
YPR086W	YMR084W	binding enriched	10.439
YOR174W	YGL010W	binding enriched	110.603
YPL075W	YDL126C	+	73.175
YNL103W	YOR085W	?	50.641
YBR240C	YJR004C	-	118.668
YLR403W	YLR312W-A	?	18.755
YNL216W	YER156C	+	39.92
YOR110W	YEL073C	binding enriched	104.018
YOR028C	YKL177W	+	46.791
YMR182C	YLR178C	-	119.851
YJR127C	YOR010C	binding enriched	55.53
YPR104C	YDL075W	binding enriched	30.123
YOR344C	YDR365W-B	+	76.738
YDR146C	YIL116W	binding enriched	78.736
YOR110W	YDL063C	binding enriched	59.019
YNL216W	YML128C	-	51.896
YBR083W	YLR042C	+	67.547
YNL216W	YPR044C	+	76.707
YPR086W	YMR175W	binding enriched	38.223
YIL101C	YOR130C	binding enriched	78.751
YPR086W	YNL008C	binding enriched	87.66
YIL131C	YBR074W	binding enriched	44.134
YBR112C	YJL077C	binding enriched	109.35
YDR463W	YNL193W	binding enriched	58.065
YDR259C	YPL085W	binding enriched	72.958
YNL236W	YDR210W-A	+	75.755
YNL216W	YHL015W	+	97.297
YPR086W	YKL162C	binding enriched	61.512
YDL005C	YGL221C	binding enriched	110.059
YPR086W	YDL238C	binding enriched	56.731
YLR403W	YPR112C	?	146.841
YPL075W	YKL192C	+	75.253
YLR403W	YEL040W	-	144.875
YPL075W	YJR117W	+	82.785
YLR176C	YML028W	binding enriched	151.579
YOR110W	YOR108W	binding enriched	2.049
YJL127C	YCR098C	?	107.74
YIL036W	YDR098C-A	+	107.66
YOR174W	YHR007C-A	binding enriched	111.646
YDL005C	YNL097C	binding enriched	100.208
YIL036W	YPL145C	+	84.84
YOL004W	YEL065W	-	58.45
YDR423C	YGL011C	-	123.377
YOR174W	YGR267C	binding enriched	88.155
YCR084C	YGL245W	+	79.339
YGR104C	YGR279C	binding enriched	38.504
YDR463W	YLR095C	binding enriched	90.306
YOR110W	YLL056C	binding enriched	78.505
YGL073W	YOR277C	+	85.633
YDL005C	YOL039W	binding enriched	48.325
YDL020C	YFL014W	-	21.337
YIL101C	YMR161W	binding enriched	72.408
YDL005C	YDR034C	binding enriched	47.549
YNL236W	YLL010C	+	84.579
YIL131C	YPR183W	binding enriched	84.19
YNL330C	YNL298W	binding enriched	23.492
YNL216W	YLR249W	+	131.887
YBR049C	YGL040C	binding enriched	68.073
YOR174W	YLR017W	binding enriched	98.69
YCR081W	YNL055C	-	75.413
YMR037C	YJL158C	binding enriched	105.402
YGR252W	YBR273C	binding enriched	30.915
YDR392W	YBL074C	binding enriched	101.164
YDL005C	YJL216C	binding enriched	91.034
YLR176C	YML116W	binding enriched	120.436
YIL101C	YHR197W	binding enriched	45.813
YDL005C	YLR120C	binding enriched	86.137
YDR123C	YPL041C	binding enriched	69.339
YDR253C	YLR281C	bound	125.562
YDR463W	YLR318W	binding enriched	112.831
YJL127C	YLR339C	+	140.288
YOR174W	YKR088C	binding enriched	84.514
YPR104C	YAL039C	binding enriched	84.716
YPL075W	YBR143C	+	56.495
YDR253C	YNL014W	bound	128.492
YER040W	YBR274W	binding enriched	90.185
YDR207C	YML101C	binding enriched	57.982
YOL148C	YMR046W-A	+	97.38
YPL254W	YLR441C	+	89.127
YOR174W	YNL255C	binding enriched	26.522
YDR463W	YMR255W	binding enriched	60.741
YHR058C	YOL005C	binding enriched	72.849
YDR123C	YER021W	binding enriched	105.858
YNL103W	YDR040C	?	102.969
YGR252W	YPR054W	binding enriched	93.309
YNL216W	YEL073C	binding enriched	79.765
YOR344C	YMR046C	+	118.594
YDL005C	YNR015W	binding enriched	36.975
YCR084C	YML058W-A	-	51.201
YGL073W	YHR216W	+	76.533
YMR042W	YCL040W	-	75.145
YDL005C	YHL029C	binding enriched	36.926
YDR392W	YPL232W	binding enriched	70.189
YIL101C	YJL050W	binding enriched	48.468
YIL131C	YKL146W	binding enriched	81.202
YNL199C	YDL021W	-	59.853
YGR252W	YCR102C	binding enriched	89.077
YDR392W	YDR510W	binding enriched	13.89
YIL131C	YLR285C-A	binding enriched	107.11
YCR084C	YHR214C-B	+	50.413
YLR176C	YDR464W	binding enriched	122.999
YLR403W	YDL070W	-	154.657
YLR098C	YFR015C	-	71.024
YIL131C	YCR071C	binding enriched	50.872
YBR083W	YGR161W-A	+	45.46
YER111C	YDR046C	binding enriched	89.975
YEL009C	YAR064W	?	40.297
YLR403W	YKL178C	?	160.691
YGR252W	YDR037W	binding enriched	94.083
YIL101C	YOR195W	binding enriched	70.439
YJL056C	YGL258W	+	73.072
YIL101C	YKL222C	binding enriched	80.781
YNL103W	YNL191W	?	35.288
YNL330C	YGR279C	binding enriched	65.78
YOR110W	YKL106W	binding enriched	32.928
YBR112C	YDR517W	binding enriched	99.008
YGL073W	YIL053W	+	28.407
YOL148C	YHR137W	+	122.367
YML007W	YDL215C	binding enriched	95.032
YNL236W	YDR238C	+	78.008
YJL127C	YBL082C	?	81.304
YBR081C	YPL026C	binding enriched	73.913
YLR403W	YNL247W	?	129.069
YJL127C	YGL135W	+	44.654
YNL236W	YDR331W	+	74.705
YML007W	YOR223W	binding enriched	129.594
YGL013C	YPR158C-C	-	93.297
YLR071C	YPL223C	binding enriched	87.992
YGR104C	YER104W	binding enriched	46.705
YML007W	YNL084C	-	100.606
YNL216W	YOR096W	+	27.26
YLR176C	YJL177W	binding enriched	134.444
YDR207C	YLR156C-A	binding enriched	119.666
YNL216W	YCR087C-A	+	85.383
YLR403W	YBR271W	?	61.26
YLR451W	YMR315W-A	binding enriched	87.378
YLR176C	YNL095C	binding enriched	114.999
YPR104C	YNL036W	binding enriched	102.643
YPL075W	YKL191W	+	74.923
YNL236W	YPL049C	+	106.551
YPL075W	YMR243C	+	56.892
YLR403W	YLR270W	?	18.272
YGR116W	YHR138C	binding enriched	49.545
YGL035C	RDN25-1	-	75.829
YIL131C	YDL173W	binding enriched	88.684
YBR112C	YIL045W	binding enriched	69.18
YBR049C	YLR229C	binding enriched	114.403
YPL075W	YLR172C	+	134.482
YJL127C	YOR378W	?	62.462
YLR071C	YDR380W	binding enriched	119.34
YGR252W	YDR490C	binding enriched	59.434
YLR176C	YHR190W	binding enriched	88.062
YJL127C	YOL143C	+	35.666
YLR403W	YDR351W	?	114.935
YDL170W	YDL019C	binding enriched	87.658
YPL139C	YML107C	-	20.231
YIR018W	YJL218W	?	90.455
YGR252W	YJL166W	binding enriched	74.51
YER040W	YLR185W	-	121.655
YDR392W	YKL086W	binding enriched	83.771
YLR403W	YCR087C-A	+	129.153
YGL013C	YPR190C	-	96.064
YIL036W	YIL078W	+	34.226
YIL131C	YNL074C	binding enriched	37.619
YGR252W	YKL150W	binding enriched	97.974
YHL020C	YOR034C	+	63.306
YIR018W	YBR076W	?	81.748
YGR252W	YDR158W	binding enriched	92.24
YBR049C	YMR202W	+	62.605
YDR392W	YHL007C	binding enriched	145.157
YLR403W	YMR049C	+	158.153
YGR252W	YDR178W	binding enriched	94.201
YGR252W	YEL065W	binding enriched	68.69
YOR028C	YOR210W	-	74.033
YMR037C	YNL231C	binding enriched	78.212
YEL009C	YOR062C	?	78.765
YER159C	YGL062W	binding enriched	49.264
YDR392W	YHR071W	+	97.799
YGR116W	YLL039C	binding enriched	64.351
YIL131C	YBR259W	binding enriched	54.204
YBR049C	YDL072C	binding enriched	74.36
YKL112W	YML040W	+	65.307
YNL236W	YBR066C	-	87.686
YFL031W	YLR214W	+	156.299
YDR463W	YDL176W	binding enriched	41.954
YMR037C	YMR316W	+	72.872
YNL236W	YDR261C-C	+	85.739
YIL131C	YAL026C	binding enriched	69.95
YIL101C	YOR145C	binding enriched	79.954
YJL127C	YBR191W	+	102.245
YDR463W	YDL023C	+	106.571
YPR086W	YGR008C	binding enriched	78.035
YPR086W	YBL101C	binding enriched	88.122
YDR392W	YDR249C	binding enriched	28.801
YLR071C	YNL178W	binding enriched	74.372
YBR049C	YJL076W	binding enriched	96.973
YER111C	YLR467W	-	91.918
YLR403W	YCR089W	-	130.798
YNL216W	YMR027W	+	73.907
YJL127C	YPL257W-A	-	107.205
YDR392W	YKL063C	binding enriched	86.717
YPL075W	YPR074C	+	25.432
YIL131C	YOR166C	binding enriched	88.636
YDL005C	YJL126W	binding enriched	82.107
YDR207C	YIR037W	-	116.394
YDR259C	YLR096W	binding enriched	95.546
YNL216W	YHR174W	+	84.775
YJL127C	YMR244W	?	111.702
YGR252W	YPL015C	binding enriched	110.459
YLR176C	YJL004C	binding enriched	162.623
YJL056C	YGL256W	+	73.971
YIL036W	YOL016C	+	59.746
YPR086W	YKL052C	binding enriched	44.015
YHR206W	YGL062W	binding enriched	50.792
YPR086W	YKL094W	binding enriched	52.693
YDR207C	YKR009C	-	106.44
YLR403W	YOL082W	?	132.225
YCL055W	YLR303W	+	144.172
YOL148C	YER156C	+	60.776
YDR463W	YPR100W	binding enriched	86.796
YDR259C	YER048W-A	binding enriched	108.556
YDR463W	YDR026C	binding enriched	88.714
YLR098C	YGR027W-B	binding enriched	42.371
YNL216W	YJL137C	+	35.91
YCR084C	snR54	+	52.841
YDR397C	YGR211W	binding enriched	75.946
YGR104C	YDR051C	binding enriched	92.086
YDR259C	YGL093W	binding enriched	111.891
YJL127C	YJL195C	?	41.738
YOR174W	YFL057C	binding enriched	64.107
YHL020C	YBR006W	-	22.039
YIR018W	YIL144W	?	67.159
YLR071C	YHR109W	binding enriched	69.743
YNL216W	YNL068C	binding enriched	35.655
YOL148C	YLR448W	+	155.454
YHR058C	YKL195W	binding enriched	90.572
YIL101C	YNL186W	binding enriched	43.209
YDL170W	YJL158C	binding enriched	88.473
YDR259C	YDR080W	binding enriched	44.304
YOR174W	YLR204W	binding enriched	141.36
YIL101C	YGL175C	binding enriched	49.969
YDR207C	YHR079C-A	binding enriched	73.49
YGR104C	YBR173C	binding enriched	31.443
YNL199C	YLR410W-A	-	134.649
YDR463W	YBL033C	binding enriched	114.557
YDR397C	YEL017C-A	binding enriched	150.789
YPR086W	YPR040W	binding enriched	14.847
YIL131C	YNR030W	binding enriched	64.019
YIL131C	YCR060W	binding enriched	50.093
YPL075W	YOL039W	+	79.52
YDR207C	YBR126C	binding enriched	78.782
YJL056C	YNR071C	binding enriched	27.274
YDR392W	YBR196C	binding enriched	84.041
YOL148C	YIR011C	+	98.019
YPL075W	YFL002W-B	-	77.545
YLR403W	YLL021W	?	154.211
YOL148C	YIL009W	+	97.304
YLR403W	YOR162C	-	141.56
YDR392W	YIL116W	binding enriched	93.359
YDL005C	YIL114C	binding enriched	69.08
YBL008W	YNL160W	-	94.027
YHR058C	YGR058W	binding enriched	68.228
YOR110W	YOR098C	binding enriched	3.866
YNL216W	YMR096W	-	80.909
YPL254W	YOL014W	+	104.62
YJL127C	YDR210W-A	-	107.131
YBR049C	YIL147C	-	65.25
YNL068C	YDR153C	binding enriched	104.761
YIR018W	YDR293C	binding enriched	132.749
YNL103W	YJR010W	?	72.906
YIL131C	YBL055C	binding enriched	35.332
YGL073W	YER036C	+	41.184
YLR403W	YDL021W	?	159.302
YDR207C	YNL030W	binding enriched	126.707
YDR207C	YPR158W	binding enriched	37.576
YJL127C	YDR447C	+	92.588
YBR049C	YLR114C	binding enriched	54.905
YLR418C	YNR074C	+	148.659
YGR252W	YPR133W-A	binding enriched	103.29
YML007W	YER069W	+	98.187
YOR174W	YOR009W	binding enriched	99.574
YGL073W	YOR293W	+	86.091
YNL216W	YGR254W	+	72.65
YGL073W	YMR145C	+	101.718
YBR049C	YCR034W	+	21.501
YJL127C	YOR323C	+	71.451
YML007W	YML026C	binding enriched	23.302
YMR037C	YDR487C	binding enriched	86.157
YIL101C	YPL248C	binding enriched	66.634
YOR110W	YER180C-A	binding enriched	76.028
YML007W	YGR209C	+	104.876
YGR252W	YGR244C	binding enriched	13.155
YDR392W	YKR013W	+	120.74
YKL112W	YOR230W	+	65.293
YPR065W	YMR319C	-	71.972
YLR403W	YMR186W	?	116.426
YIL036W	YLR179C	+	123.819
YLR098C	YDR316W-B	binding enriched	102.551
YML007W	YLL049W	binding enriched	51.917
YPR086W	YDR330W	binding enriched	66.595
YDR259C	YMR305C	binding enriched	42.807
YHR058C	YNL300W	binding enriched	115.499
YNL216W	YLR379W	+	136.026
YCR084C	YML040W	+	42.198
YNL103W	YHR183W	?	84.341
YBR049C	YIL162W	+	72.114
YNL330C	YPR102C	binding enriched	101.761
YBR049C	YDL039C	binding enriched	66.326
YOR174W	YAL044W-A	binding enriched	94.847
YLR403W	YPL260W	-	102.85
YLR176C	YDR347W	binding enriched	123.911
YGL073W	YMR108W	+	103.52
YOL108C	YNL156C	binding enriched	29.459
YNL236W	YAL038W	+	70.83
YLR403W	YER173W	-	97.978
YPR052C	YER104W	binding enriched	69.824
YJL127C	YOL119C	?	46.27
YDR423C	YBR157C	+	65.714
YIL101C	YPL056C	binding enriched	73.246
YOR174W	YDL038C	binding enriched	72.858
YLR176C	YNL274C	binding enriched	111.925
YGR252W	YGL246C	binding enriched	18.521
YIR018W	YGL094C	binding enriched	78.567
YNL103W	YAR035W	?	99.797
YBR049C	YBL105C	binding enriched	42.193
YLR403W	YCR097W-A	-	133.441
YIL131C	YAR023C	binding enriched	87.26
YPL075W	YLR441C	+	132.23
YHR041C	YIL051C	+	56.062
YHL027W	YMR319C	+	98.57
YEL009C	YML012C-A	?	46.171
YLR176C	YMR298W	binding enriched	97.674
YDR463W	YMR018W	binding enriched	105.083
YPL254W	YJL158C	+	110.139
YER159C	YDL046W	binding enriched	84.724
YIL101C	YLL018C	binding enriched	45.976
YIL101C	YAL065C	binding enriched	70.313
YJL056C	YBR048W	binding enriched	104.034
YIL036W	YNL284C-A	+	100.512
YNL216W	YCL009C	+	106.604
YOR110W	YDL202W	binding enriched	37.273
YPL177C	YLR214W	+	99.49
YPR104C	YBL027W	binding enriched	68.286
YOR110W	YGL172W	binding enriched	82.91
YMR042W	YOR150W	+	86.047
YOL148C	YAL003W	+	101.011
YNL216W	YBR196C	+	91.878
YPR133C	YKR031C	binding enriched	51.995
YPL075W	YEL037C	+	95.637
YEL009C	YOR383C	-	113.936
YBR083W	YAL007C	+	90.932
YDR423C	YBL061C	-	101.374
YJL127C	YLR326W	?	140.243
YPL075W	YDR388W	+	96.015
YEL009C	YLR080W	?	62.91
YLR176C	YLL052C	binding enriched	123.306
YER159C	YLR304C	binding enriched	98.42
YDR463W	YDL184C	binding enriched	38.01
YLR403W	YMR194W	+	116.494
YGL073W	YMR120C	+	97.623
YDL170W	YPL009C	binding enriched	98.808
YPL075W	YBR196C-A	binding enriched	65.821
YPL075W	YML024W	+	43.556
YDR207C	YKL163W	binding enriched	66.703
YNL330C	YPL016W	binding enriched	123.737
YDL020C	YNL146W	+	86.05
YGL073W	YFL026W	+	83.454
YIL131C	YKL032C	binding enriched	85.182
YEL009C	YGL152C	?	96.654
YDR207C	YHL030W	binding enriched	102.304
YLR403W	YOR320C	-	106.287
YGL073W	YML100W	+	75.743
YER040W	YCR069W	binding enriched	65.59
YEL009C	YML066C	?	83.959
YIL131C	YHR086W-A	binding enriched	63.546
YCR084C	YGL234W	+	91.161
YER111C	YBL111C	-	46.282
YML007W	YMR183C	binding enriched	90.881
YHL020C	YDR497C	-	107.534
YBR083W	YJR028W	+	91.63
YLR403W	YGL028C	-	133.253
YIL036W	YOR204W	+	111.227
YOR038C	YBR045C	-	86.31
YPR086W	YMR303C	binding enriched	58.118
YCR084C	YHL050C	+	35.857
YOR174W	YDR518W	binding enriched	34.135
YGL073W	YNL036W	-	64.721
YNL068C	YJR045C	binding enriched	44.6
YNL236W	YDR292C	+	77.001
YIL131C	YBR242W	binding enriched	56.475
YOR110W	YGR132C	binding enriched	85.756
YJL127C	YNL030W	+	46.499
YMR037C	YOR068C	binding enriched	62.691
YBR112C	YOL032W	binding enriched	104.428
YML007W	YGR130C	-	92.281
YPL075W	YOR280C	+	112.43
YNL103W	YHR071W	?	94.678
YLR403W	YGR087C	+	91.366
YJL127C	YCR083W	?	82.13
YDR392W	YCL025C	binding enriched	136.098
YBR081C	YNL098C	binding enriched	84.829
YDR392W	YMR240C	binding enriched	61.109
YML007W	YLR154C	binding enriched	114.88
YOR110W	YHR214C-C	binding enriched	139.232
YGL073W	YLR413W	+	102.366
YOR174W	YER083C	binding enriched	63.345
YDL170W	YMR164C	binding enriched	71.082
YPL254W	YBR012W-B	+	89.706
YPR086W	YOR292C	binding enriched	100.767
YIL101C	YGL241W	binding enriched	56.88
YLR403W	YLR186W	?	30.82
YLR403W	YGL225W	-	70.043
YIL101C	YPL140C	binding enriched	47.086
YOR110W	YGL032C	binding enriched	86.601
YCR084C	YFL026W	+	49.016
YER111C	YFR015C	-	86.894
YEL009C	YPL111W	?	111.633
YLR403W	YNL149C	-	124.017
YIL101C	YLR081W	binding enriched	33.753
YER040W	YOR285W	-	75.065
YDR463W	YGR235C	+	67.657
YDR463W	YOR034C	+	88.987
YDR463W	YFR030W	-	126.998
YPL075W	YGR038W	+	79.914
YDR392W	YLR256W-A	+	126.595
YOR174W	YDR529C	binding enriched	27.327
YIL036W	YLL045C	+	25.014
YIL101C	YGL023C	binding enriched	26.319
YDR207C	YJR006W	binding enriched	119.321
YBR049C	YJL144W	binding enriched	101.091
YOR363C	YDL136W	-	67.31
YJR127C	YLL009C	binding enriched	60.919
YIL131C	YIL090W	binding enriched	20.366
YLR403W	YJL148W	?	123.176
YPR086W	YJR059W	binding enriched	84.971
YEL009C	Q0297	?	nan
YLR403W	YGL076C	+	98.279
YDL106C	YPL019C	+	69.166
YDL005C	YBR047W	binding enriched	70.47
YLR451W	YBR205W	binding enriched	73.152
YLR071C	YNR001C	binding enriched	69.824
YOR174W	YER041W	binding enriched	79.862
YGR252W	YGL113W	binding enriched	42.868
YLR176C	YLR002C	binding enriched	160.002
YDR463W	YKL023W	binding enriched	119.474
YDL005C	YOR196C	binding enriched	107.627
YDR259C	YCL001W-B	binding enriched	140.509
YJL056C	YKL175W	+	62.847
YJL127C	YLR148W	?	77.802
YIL036W	YLR142W	-	61.19
YIL101C	YNL162W	binding enriched	48.148
YPL075W	YER041W	+	88.971
YLR223C	YEL054C	bound	126.14
YLR403W	YIR009W	-	174.271
YOL004W	YPR069C	+	63.505
YDR392W	YDR210W	binding enriched	33.601
YOR110W	YHR051W	binding enriched	109.917
YMR037C	YBR024W	binding enriched	54.834
YML007W	YBL032W	binding enriched	46.142
YDR259C	YIL121W	binding enriched	89.142
YDR392W	YBR244W	+	95.346
YJL127C	YMR006C	?	76.693
YIL036W	YOR215C	-	116.047
YDL170W	YBR039W	binding enriched	112.939
YJL127C	YLR167W	+	120.134
YOR174W	YJR017C	binding enriched	92.446
YOR110W	YKL209C	binding enriched	28.715
YLR071C	YJR117W	binding enriched	65.45
YER159C	YJR006W	binding enriched	95.455
YGL073W	YIL140W	+	17.969
YIL101C	YOR243C	binding enriched	72.92
YNL103W	YLR327C	?	131.181
YCR084C	YGR090W	+	47.004
YOL148C	YHR071W	+	107.703
YDL170W	YJR008W	binding enriched	96.19
YIL036W	YHR188C	+	67.387
YLR176C	YPL204W	binding enriched	114.44
YMR223W	YBR085C-A	binding enriched	55.009
YNL068C	YPL026C	binding enriched	93.921
YMR070W	YGL032C	-	87.302
YGR252W	YEL011W	binding enriched	109.926
YIL131C	YLR222C	binding enriched	101.803
YML007W	YLR042C	binding enriched	78.667
YDL005C	YDR260C	binding enriched	119.334
YNL103W	YLR235C	?	124.024
YDR259C	YOR124C	binding enriched	66.539
YIL101C	YDR011W	binding enriched	45.864
YNL236W	YJL111W	+	28.469
YJR060W	YMR250W	-	109.873
YIL131C	YBR216C	binding enriched	54.716
YHL020C	YNL256W	-	114.65
YIL101C	YOL166W-A	binding enriched	55.787
YJR127C	YDR084C	binding enriched	49.163
YIL101C	YBL015W	binding enriched	39.381
YDR259C	YDR051C	binding enriched	66.102
YGR252W	YOR186W	binding enriched	80.89
YOR174W	YDL039C	binding enriched	72.858
YOL004W	YER044C	-	58.061
YIL131C	YGR035W-A	binding enriched	39.236
YER159C	YNL241C	binding enriched	44.377
YIL101C	YJL158C	binding enriched	54.653
YDR259C	YCR043C	binding enriched	101.045
YDR207C	YIL114C	-	93.14
YDR463W	YML129C	binding enriched	68.601
YDR253C	YML091C	bound	66.707
YEL009C	YMR195W	?	121.739
YJL127C	snR190	?	17.898
YER111C	YEL017C-A	binding enriched	80.627
YLR403W	YGR158C	?	68.671
YIR018W	YNR020C	?	36.292
YBR049C	YLR308W	binding enriched	110.105
YLR403W	YKL205W	?	137.336
YDR463W	YBR143C	binding enriched	83.436
YIL036W	YKR059W	+	95.701
YOL004W	YJL088W	-	65.158
YLR176C	YPR081C	binding enriched	148.842
YML007W	YFR040W	-	33.975
YNL103W	YGL125W	?	39.672
YGL073W	YBR286W	+	68.855
YOR174W	YIR011C	binding enriched	121.053
YGR252W	YKR072C	binding enriched	116.717
YDL020C	YNL160W	-	80.309
YIL101C	YOR327C	binding enriched	83.955
YDR463W	YHL047C	-	121.086
YJL127C	YEL054C	+	46.253
YNL216W	YGR253C	binding enriched	71.209
YBR049C	YNL221C	binding enriched	88.626
YLR176C	YIR038C	binding enriched	144.237
YIL131C	YDR392W	binding enriched	98.032
YDR392W	YCR102C	binding enriched	129.663
YOR174W	YGL153W	binding enriched	80.413
YPR086W	YPL004C	binding enriched	66.981
YOR110W	YCL027W	binding enriched	100.414
YDR259C	YIL148W	binding enriched	105.017
YDR259C	YDR351W	binding enriched	17.236
YOR174W	YLR099W-A	binding enriched	87.59
YKR099W	YGR027W-A	-	89.463
YOR110W	YJL065C	binding enriched	52.986
YER159C	YJR096W	binding enriched	53.614
YIL131C	YNL185C	binding enriched	48.694
YNL216W	YJL012C	+	75.515
YGR252W	YDL157C	binding enriched	94.842
YBR081C	YLR327C	binding enriched	93.644
YPL075W	YDR353W	+	91.738
YDL170W	YDR182W-A	binding enriched	49.505
YBR049C	YBR249C	+	50.751
YDR397C	YJR006W	binding enriched	134.402
YDR259C	YBL104C	binding enriched	120.308
YGR116W	YBR249C	binding enriched	25.388
YML007W	YHR042W	binding enriched	41.337
YOR174W	YOL043C	binding enriched	66.875
YPL254W	YMR038C	+	69.812
YIL131C	YBR132C	binding enriched	66.719
YIL131C	YLR043C	binding enriched	30.996
YGR252W	YDR054C	binding enriched	100.695
YIL101C	YGR008C	binding enriched	48.369
YPL254W	YMR045C	+	63.743
YIR018W	YML131W	?	73.988
YDR169C	YCL027W	+	109.078
YLR403W	YMR119W-A	+	134.224
YLR451W	YHR208W	+	101.196
YHR084W	YGL147C	binding enriched	88.861
YDR423C	YNR009W	+	131.571
YJR140C	YGR108W	+	78.838
YGR252W	YBR137W	binding enriched	52.213
YLR403W	YPL221W	?	94.353
YIL101C	YKL058W	binding enriched	57.314
YNL068C	YLR152C	binding enriched	72.237
YDR253C	YER088C	bound	75.442
YDR259C	YOR369C	binding enriched	68.487
YMR037C	YIL089W	binding enriched	61.138
YGR252W	YDR152W	binding enriched	90.688
YBR049C	YER085C	binding enriched	74.772
YBR049C	YFR052W	+	88.537
YPR086W	YJR006W	binding enriched	85.204
YDR259C	YLR157C	binding enriched	118.352
YDL005C	YGR037C	binding enriched	65.432
YNL199C	YOR393W	+	65.725
YNL103W	YHR007C	?	96.442
YIL101C	YGL070C	binding enriched	31.357
YGL181W	YPL257W-A	+	75.243
YBR049C	YOR237W	binding enriched	115.073
YEL009C	YHR022C	?	50.799
YOL148C	YLR355C	+	160.49
YIR018W	YOR275C	binding enriched	125.582
YLR014C	YOR034C	+	42.687
YPR086W	YDR171W	binding enriched	42.054
YGL073W	YJR015W	+	86.216
YGR116W	YNL079C	binding enriched	74.312
YOR110W	YPL101W	binding enriched	95.891
YGL035C	YMR085W	-	86.202
YDL005C	YFL021W	binding enriched	6.211
YML027W	YLR465C	-	159.529
YDL005C	YPR159C-A	binding enriched	83.036
YIL131C	YFL057C	binding enriched	60.061
YIR018W	YOR255W	?	124.866
YIL131C	YHR036W	binding enriched	57.982
YLR403W	YER069W	+	103.659
YOL108C	YKR018C	binding enriched	65.041
YDR259C	YLR298C	binding enriched	128.936
YNL216W	YEL046C	+	74.626
YLR176C	YOR379C	-	94.433
YMR037C	YPL166W	binding enriched	51.272
YHR058C	YGR198W	binding enriched	67.844
YOR174W	YNL297C	binding enriched	18.783
YPR052C	YPL055C	binding enriched	33.681
YDR207C	YDR365W-B	+	40.037
YNL216W	YDR299W	-	78.761
YER159C	YIL121W	binding enriched	42.712
YLR403W	YFR001W	-	173.954
YDR463W	YOL077C	binding enriched	73.814
YPR086W	YGR215W	binding enriched	81.696
YDR253C	YLR141W	bound	91.516
YML007W	YJL058C	binding enriched	82.008
YNL236W	YPL240C	+	94.683
YHR058C	YIL009W	binding enriched	75.512
YER159C	YLR312C	binding enriched	99.125
YLR403W	YOR361C	+	94.209
YDR448W	YDR046C	binding enriched	86.229
YNL330C	YLR465C	+	97.861
YJL127C	YOR009W	?	68.685
YLR403W	YNL231C	?	132.294
YLR403W	YOR303W	?	107.352
YPR104C	YDR234W	binding enriched	61.746
YJR060W	YOL016C	-	44.933
YOR344C	YMR045C	+	118.482
YDR207C	YDR180W	binding enriched	17.184
YOR110W	YGR283C	binding enriched	106.977
YEL009C	YOR391C	?	125.582
YJL127C	YKL209C	?	71.425
YPR086W	YOL032W	binding enriched	64.246
YJL127C	YJR047C	?	45.209
YDR259C	YBR126C	binding enriched	82.611
YLR223C	YLR388W	bound	24.015
YER111C	YDR487C	binding enriched	67.809
YPL075W	YOR095C	+	94.293
YLR403W	YOL101C	+	150.132
YKL112W	YIL051C	+	93.289
YDR463W	YLR102C	binding enriched	93.454
YML007W	YGR007W	binding enriched	30.167
YJL127C	YOL085C	?	41.934
YGR252W	YLR262C-A	binding enriched	65.044
YLR403W	YOL127W	+	133.099
YDR392W	YDL182W	binding enriched	40.247
YNL103W	YER019W	?	63.119
YLR176C	YJL193W	binding enriched	135.315
YLR403W	YFL031W	+	168.124
YKL015W	YIL123W	binding enriched	73.811
YNL236W	YBR005W	+	88.991
YDR463W	YHR011W	binding enriched	119.968
YDR146C	YER042W	binding enriched	93.009
YPL075W	YLR150W	+	91.226
YDR463W	YLR304C	binding enriched	116.155
YPR065W	YLR261C	-	160.343
YDL005C	YJL176C	binding enriched	109.817
YLR403W	YGR202C	?	80.574
YJL127C	YLL061W	?	50.153
YBR112C	YHR080C	binding enriched	32.675
YGL073W	YER056C-A	+	31.25
YDR259C	YER154W	binding enriched	73.859
YDL005C	YGR093W	binding enriched	87.951
YDR463W	YAL054C	binding enriched	117.666
YLR403W	YGL258W	?	83.948
YLR223C	YBL087C	bound	86.478
YML007W	YJR027W	-	67.922
YJL127C	YPR158W-B	-	108.553
YBR049C	YLR356W	binding enriched	107.906
YPR065W	YJR150C	-	78.378
YDL170W	YBR007C	binding enriched	108.971
YNL216W	YPL144W	binding enriched	67.844
YDR253C	YOR230W	bound	69.281
YHR058C	YNL281W	binding enriched	98.762
YPL230W	YHR003C	+	108.353
YGR252W	YBL041W	binding enriched	74.443
YDR423C	YHR088W	-	90.805
YGL013C	YNL193W	-	70.49
YLR403W	YBR258C	?	70.113
YIL131C	YLR259C	binding enriched	100.614
YLR071C	YPR042C	binding enriched	87.58
YLR014C	YOL126C	+	71.701
YGR252W	YJL051W	binding enriched	93.474
YGR104C	YLR204W	binding enriched	70.946
YMR037C	YFL016C	binding enriched	55.005
YDR146C	YKR069W	binding enriched	62.754
YIL131C	YML012W	binding enriched	75.361
YLR071C	YFL061W	binding enriched	79.67
YNL199C	YBR179C	-	79.427
YPL075W	YIL018W	+	80.711
YPR133C	YGL258W-A	binding enriched	96.751
YLR223C	YKL156W	bound	161.786
YIL101C	YOR367W	binding enriched	66.498
YGR252W	YNL110C	binding enriched	60.623
YOL089C	YMR011W	+	65.017
YLR403W	YLR301W	?	12.291
YLR176C	YNL169C	binding enriched	114.053
YDL005C	YGR225W	binding enriched	116.298
YJL127C	YDR472W	?	93.687
YHR058C	YLR052W	binding enriched	80.526
YPR104C	YLL012W	binding enriched	85.99
YBR112C	YKL037W	binding enriched	105.04
YOR110W	YLR383W	binding enriched	156.946
YDR392W	YDR365W-A	+	18.005
YDR423C	YNL115C	-	68.29
YBR049C	YIL062C	binding enriched	52.343
YGR104C	YEL066W	binding enriched	51.359
YJL127C	YIL167W	?	37.845
YNR010W	YMR189W	+	118.041
YDL020C	YDR281C	+	100.244
YLR403W	YBR040W	?	131.488
YIL101C	YFL010W-A	binding enriched	57.829
YLR403W	YCL018W	+	165.353
YJL127C	YOL104C	?	48.091
YJL127C	YOR349W	?	65.204
YPL254W	YGL032C	+	93.903
YGL073W	YJL079C	-	64.063
YCR084C	YOL101C	+	90.294
YLR403W	YNL339C	+	97.097
YGR116W	YOR020W-A	binding enriched	106.003
YDR043C	YLR162W-A	-	143.203
YDR392W	YPL209C	-	55.748
YIR018W	YOR063W	binding enriched	81.06
YPR086W	YNR069C	binding enriched	101.127
YLR403W	YMR216C	+	99.198
YIL036W	YLR061W	+	21.945
YLR403W	YBL094C	+	98.613
YBL103C	YOR220W	+	123.878
YOR174W	YNL012W	binding enriched	114.195
YDR259C	YGL209W	binding enriched	82.213
YIL036W	YNL134C	-	84.605
YJL127C	YER172C-A	?	34.689
YKR099W	YER092W	binding enriched	74.863
YDR392W	YPL240C	binding enriched	69.645
YNL236W	YIL040W	-	86.284
YOL148C	YBR296C	+	125.935
YDR207C	YKL074C	binding enriched	76.112
YJL056C	YCR021C	-	86.575
YGR252W	YPL028W	binding enriched	117.686
YPL075W	YLR410W-A	-	142.051
YDR253C	YEL071W	bound	111.799
YPL075W	YFL037W	+	57.135
YNL103W	YLR137W	?	71.185
YER159C	YMR105C	binding enriched	96.217
YLR176C	YOL105C	binding enriched	149.565
YHR058C	YJR140C	binding enriched	88.618
YGR252W	YPL029W	binding enriched	117.061
YLR403W	YJL125C	?	133.503
YOR110W	YML013W	binding enriched	99.421
YNL216W	YLR325C	+	134.854
YJL127C	YHL005C	?	100.265
YPL139C	YLR194C	+	109.242
YOR110W	YPL022W	binding enriched	92.128
YPL075W	YCR028C-A	+	49.101
YPR086W	YGL121C	binding enriched	89.154
YDR423C	YOL103W-A	+	75.454
YBL103C	YOR382W	-	89.181
YMR164C	YHR055C	+	56.931
YNL103W	YNL249C	?	25.099
YGR252W	YGR146C-A	binding enriched	25.767
YNL103W	YBR020W	?	90.113
YGR116W	YJL141C	binding enriched	78.133
YIR018W	YHR112C	?	83.192
YJL127C	YJR158W	-	44.724
YIL036W	YBR068C	+	55.572
YHR206W	YIL089W	binding enriched	43.902
YIL101C	YPR006C	binding enriched	63.917
YOR110W	YDR320C-A	binding enriched	80.423
YLR403W	YPR029C	-	163.544
YDR253C	YLL057C	bound	95.021
YGR252W	YLR367W	binding enriched	67.156
YDR146C	YDR121W	binding enriched	19.771
YDR259C	YKL071W	binding enriched	80.419
YGR104C	YER144C	binding enriched	63.637
YOL148C	YHR128W	+	119.83
YHR206W	YBR244W	+	34.302
YJL127C	YBR216C	?	95.822
YOL148C	YAL004W	+	99.92
YLR451W	YOR320C	binding enriched	104.976
YDR123C	YHR039C-A	binding enriched	73.523
YIL101C	YDL070W	binding enriched	67.008
YJL127C	YPR001W	?	95.662
YJL127C	YMR190C	?	117.281
YML007W	YER154W	binding enriched	102.474
YDR392W	YDL097C	binding enriched	66.379
YLR403W	YGR037C	?	123.44
YIL131C	YNL031C	binding enriched	65.015
YDL170W	YBL060W	binding enriched	110.775
YLR176C	YDR288W	binding enriched	126.78
YLR176C	YIL106W	binding enriched	106.125
YLR403W	YJR160C	-	155.738
YLR098C	YLR157C-B	binding enriched	70.845
YPR086W	YHR210C	binding enriched	70.738
YGR252W	YMR302C	binding enriched	39.671
YBR049C	YKR026C	+	76.489
YDR253C	YOR349W	bound	84.728
YLR403W	YDR382W	?	108.051
YML007W	YJL107C	binding enriched	82.195
YNL216W	YGL062W	-	66.16
YOL004W	YLR173W	-	160.536
YPL254W	YER138W-A	+	81.017
YDL005C	YML014W	binding enriched	20.163
YPL254W	YLR413W	+	99.981
YNL330C	YPL155C	binding enriched	76.606
YIL131C	YGL196W	binding enriched	47.723
YLR176C	YJR002W	binding enriched	163.997
YIL036W	YMR008C	-	42.055
YOR174W	YEL059C-A	binding enriched	99.57
YLR403W	YPL048W	+	161.496
YNL229C	YHR136C	binding enriched	93.264
YER111C	YOL113W	binding enriched	66.204
YPR133C	YLR219W	binding enriched	152.82
YOL004W	YGR149W	-	107.13
YER159C	YGL205W	binding enriched	18.633
YDR259C	YBR243C	binding enriched	90.307
YOR028C	YKL178C	+	47.059
YJL127C	YFL054C	?	61.152
YAL051W	YOL014W	+	27.49
YLR071C	YML129C	binding enriched	63.584
YDL005C	YKL148C	binding enriched	75.385
YPR086W	YJL100W	binding enriched	94.029
YDR253C	YFR034C	bound	104.909
YNL236W	YLR432W	+	139.194
YIL131C	YBR221W-A	binding enriched	50.913
YDL170W	YDL090C	binding enriched	28.671
YML007W	YBR181C	binding enriched	97.149
YGL073W	YDR258C	+	107.076
YJL127C	YLR265C	?	133.354
YDR392W	YBR071W	binding enriched	96.082
YBL008W	YGR108W	+	76.786
YNL330C	YLR061W	binding enriched	100.722
YNL330C	YPL090C	binding enriched	103.937
YLR071C	YAL038W	binding enriched	89.499
YGR252W	YGR251W	binding enriched	1.251
YEL009C	YMR057C	?	89.103
YLR223C	YBL027W	bound	125.586
YLR098C	YAR010C	binding enriched	87.456
YNL216W	YPR042C	binding enriched	78.212
YIL131C	YER001W	binding enriched	71.011
YPL075W	YKL182W	+	86.881
YBR049C	YBR229C	binding enriched	46.923
YBR279W	YDR083W	binding enriched	87.66
YNL216W	YEL026W	+	82.13
YGR252W	YJL174W	binding enriched	79.902
YBR049C	YML109W	binding enriched	44.474
YBR049C	YDR170W-A	-	82.71
YDR259C	YHR059W	binding enriched	92.269
YNL216W	YLR387C	binding enriched	133.859
YGL073W	YBR072W	+	48.065
YLR403W	YGR260W	?	60.061
YGR252W	YPR091C	binding enriched	84.583
YIL036W	YMR242C	+	103.754
YGR252W	YGL051W	binding enriched	63.956
YJL127C	YGL175C	?	56.805
YIR018W	YJL170C	?	103.735
YIL101C	YNL312W	binding enriched	82.557
YOR174W	YBR222C	binding enriched	89.048
YOR344C	YDL136W	-	86.012
YDL005C	YDL039C	binding enriched	42.717
YIL101C	YHR120W	binding enriched	57.016
YPL075W	YNL160W	-	100.212
YDR253C	YHR083W	bound	75.618
YER159C	YHL021C	binding enriched	107.094
YDL170W	YPR157W	binding enriched	43.109
YNL330C	YNL149C	binding enriched	41.51
YIR018W	YML062C	?	76.707
YLR418C	YLR452C	+	9.986
YJL127C	YPL143W	+	88.718
YML007W	YER091C	binding enriched	87.276
YGR252W	YBL029C-A	binding enriched	79.077
YPR086W	YER142C	binding enriched	83.595
YDL170W	YMR001C	binding enriched	104.983
YER109C	YGR166W	+	50.603
YPR133C	YPL282C	binding enriched	73.942
YDL106C	YMR011W	+	68.243
YOL148C	YHL033C	+	115.641
YBR049C	YMR184W	binding enriched	49.771
YDL005C	YMR031C	binding enriched	41.466
YBR279W	YOR230W	binding enriched	110.373
YNL167C	YKR093W	+	82.005
YHL020C	YDR123C	-	85.606
YDR463W	YER062C	binding enriched	91.42
YML007W	YNL149C	binding enriched	105.664
YLR176C	YGR054W	binding enriched	88.097
YNL216W	YGR161W-A	-	96.247
YPR086W	YJR076C	binding enriched	74.813
YLR403W	YGR152C	-	67.518
YDR310C	YFR032C	-	126.82
YOR110W	YNL016W	binding enriched	91.34
YOR174W	YCR051W	binding enriched	103.94
YDL170W	YHR072W	binding enriched	88.441
YDL005C	YPL103C	binding enriched	82.33
YDR146C	YBR196C	binding enriched	73.944
YLR071C	YJR120W	binding enriched	63.144
YIL101C	YIL123W	binding enriched	12.333
YGL073W	YNL327W	+	88.163
YER159C	YPL056C	binding enriched	112.756
YPL254W	YER034W	binding enriched	95.725
YGL073W	YPR043W	+	89.022
YPL254W	YHR215W	+	69.027
YOR110W	YIR033W	binding enriched	88.148
YNL236W	YER165W	+	50.519
YDR207C	YDR457W	binding enriched	37.561
YEL009C	YDL198C	?	117.004
YBR112C	YBR183W	binding enriched	25.357
YJR127C	YFR017C	binding enriched	64.54
YIL101C	YHR064C	binding enriched	55.23
YER040W	YHR108W	binding enriched	77.961
YDL005C	YOR234C	binding enriched	119.246
YOR174W	YMR203W	binding enriched	90.997
YDR259C	YNL054W	binding enriched	111.116
YDL005C	YDR345C	binding enriched	126.01
YMR182C	YMR316W	-	38.941
YDR259C	YNL131W	binding enriched	83.724
YDR259C	YER063W	binding enriched	108.3
YLR403W	YHR020W	+	154.775
YBR049C	YDR414C	binding enriched	111.1
YDR259C	YMR289W	binding enriched	44.182
YPR104C	YPR036W-A	binding enriched	18.895
YER159C	YFR015C	binding enriched	102.966
YER159C	YDR533C	binding enriched	63.436
YBR049C	YDR342C	-	101.051
YLR176C	YDR370C	binding enriched	121.257
YNL216W	YAL034C	binding enriched	75.484
YLR403W	YNL053W	?	138.173
YBR182C	YOR383C	+	65.04
YLR403W	YCL031C	?	155.056
YDR463W	YNL276C	-	39.166
YOR110W	YMR197C	binding enriched	94.605
YNL103W	YBR213W	?	93.434
YLR403W	YER081W	?	100.792
YOL116W	YNR024W	-	74.617
YLR403W	YGR160W	+	69.949
YIR018W	YGL058W	binding enriched	64.258
YDL005C	YJL192C	binding enriched	112.028
YER159C	YDR085C	binding enriched	75.417
YNL216W	YGL116W	binding enriched	57.568
YHL027W	YLL053C	-	60.823
YOL004W	YJR069C	+	48.942
YDR392W	YNL098C	binding enriched	91.979
YML007W	YDL073W	binding enriched	72.047
YLR403W	YNR050C	?	159.561
YDR423C	YIL065C	-	110.935
YNL330C	YKR022C	binding enriched	104.804
YDR259C	YLR350W	binding enriched	122.05
YIL131C	YMR167W	binding enriched	91.634
YBR083W	YDR098C-A	+	70.223
YJL127C	YLL017W	?	66.627
YMR016C	YBR296C	+	109.615
YNL236W	YOR071C	+	30.043
YBR049C	YOR353C	binding enriched	113.614
YPL139C	YBR244W	+	53.414
YNL216W	YHL001W	+	102.644
YLR014C	YGL197W	+	95.33
YDL005C	YLR323C	binding enriched	167.312
YDL005C	YNL115C	binding enriched	90.277
YPL254W	YDL022W	+	83.609
YHR058C	YOR008C	binding enriched	84.106
YGR252W	YHR199C-A	binding enriched	46.69
YIL131C	YMR278W	binding enriched	65.117
YNL103W	YLR237W	?	123.231
YIL101C	YOR183W	binding enriched	71.942
YJL127C	YGR133W	?	67.129
YLR176C	YOL117W	binding enriched	141.796
YOL148C	YBR158W	+	108.02
YIL101C	YDR454C	binding enriched	76.64
YIL101C	YDL007W	binding enriched	58.435
YPL254W	YDR261C-D	+	55.65
YLR071C	YGR213C	binding enriched	65.038
YLR176C	YBL034C	binding enriched	112.588
YLR403W	YAR028W	?	194.344
YOL004W	YKL216W	+	73.739
YNL236W	YCR082W	-	88.896
YIL101C	YNL079C	binding enriched	45.561
YIL101C	YMR237W	binding enriched	73.263
YGR252W	YLR035C	binding enriched	81.721
YGL013C	YDL150W	-	101.916
YPL075W	YDL046W	+	51.741
YOR028C	YBR229C	binding enriched	97.551
YMR021C	YLR035C-A	+	77.889
YLR418C	YFL066C	+	153.633
YGR252W	YPL183W-A	binding enriched	50.393
YDL005C	YJL073W	binding enriched	68.213
YOR174W	YNL014W	binding enriched	113.456
YOR174W	YCR105W	binding enriched	126.967
YLR403W	YML008C	?	172.924
YNL216W	YER045C	binding enriched	47.357
YDL170W	YOR090C	binding enriched	37.879
YJL127C	YGR025W	?	75.376
YDR207C	YKL035W	binding enriched	87.214
YDL170W	YMR316C-A	+	70.671
YLR403W	YIR028W	-	160.797
YDR392W	YDR406W	binding enriched	14.878
YIL101C	YPL097W	binding enriched	69.81
YPL075W	YBR189W	+	65.63
YDR253C	YNL098C	bound	94.533
YBR049C	YDR497C	binding enriched	87.304
YNL216W	YBR182C	binding enriched	83.743
YDL005C	YDR276C	binding enriched	114.24
YPL202C	YLR194C	+	112.877
YLR418C	YBR152W	-	87.4
YCR084C	YLL024C	binding enriched	46.058
YNL236W	YDL095W	+	54.275
YDR259C	YOR340C	binding enriched	75.959
YNL216W	YNL096C	+	36.606
YOL148C	YKR013W	+	84.115
YLR403W	YOR357C	?	93.792
YNL103W	YLR301W	?	129.461
YCR084C	YJL107C	binding enriched	72.892
YNL216W	YOR152C	binding enriched	39.275
YDR423C	YIL127C	-	78.731
YPR133C	YLR162W-A	binding enriched	148.833
YDL005C	YJL127C	binding enriched	82.494
YJL127C	YER036C	+	32.176
YEL009C	YOL143C	?	87.982
YLR055C	YBR073W	binding enriched	56.43
YDR463W	YOR273C	+	41.719
YDL005C	YGR133W	binding enriched	90.849
YLR403W	YBR055C	?	113.876
YIL036W	snR54	+	84.714
YBR049C	YDR098C-A	-	84.866
YDR207C	YIL094C	-	78.781
YDR463W	YNL238W	binding enriched	60.668
YPL075W	YPL265W	-	45.037
YCR084C	YGL158W	-	75.517
YPL075W	YEL026W	+	104.554
YDR310C	YFR023W	-	138.867
YDR392W	YGR210C	binding enriched	72.162
YNL103W	YEL059W	?	61.67
YIL036W	YGR234W	+	86.652
YBR049C	YPR143W	binding enriched	78.78
YDR253C	YGL234W	bound	85.126
YGL073W	YPL207W	+	91.798
YDR463W	YPL115C	binding enriched	81.409
YML099C	YIL096C	-	46.837
YGR252W	YNL328C	binding enriched	61.264
YGR252W	YBR154C	binding enriched	36.984
YGL071W	YKL096W	+	95.729
YLR403W	YMR126C	?	129.79
YIL131C	YKL025C	binding enriched	88.209
YIL101C	YIL120W	binding enriched	10.734
YIR018W	YPL077C	?	85.33
YNL236W	YIL009W	+	93.875
YPL254W	YNL217W	+	90.309
YDL170W	YHR010W	binding enriched	100.415
YBR049C	YGR231C	binding enriched	71.875
YDL005C	YLR114C	binding enriched	87.019
YOR110W	YGR261C	binding enriched	99.277
YPR104C	YIL068C	binding enriched	88.784
YLR403W	YLL022C	?	152.766
YEL009C	YDL221W	?	103.032
YBR112C	YNL065W	binding enriched	94.075
YIR018W	YDR176W	binding enriched	128.686
YOR110W	YGR099W	binding enriched	113.75
YER159C	YPR065W	binding enriched	102.283
YKR099W	YER159C-A	-	92.089
YDL170W	YPL030W	binding enriched	93.786
YPR086W	YOR134W	binding enriched	78.016
YER159C	YMR140W	binding enriched	96.818
YPL254W	YMR006C	+	96.716
YDR259C	YBR139W	binding enriched	82.861
YER159C	YNL131W	binding enriched	31.021
YDR123C	YLR085C	binding enriched	100.459
YLR055C	YDR046C	binding enriched	100.903
YLR403W	YGR258C	?	59.496
YDR259C	YOR367W	binding enriched	68.383
YOL148C	YJR123W	+	46.323
YOL004W	YMR191W	-	106.329
YOR110W	YGR007W	binding enriched	101.976
YDR463W	YBR043C	binding enriched	115.866
YDR253C	YKL094W	bound	69.921
YDR207C	YDR246W-A	binding enriched	10.663
YIL131C	YHR178W	binding enriched	45.612
YDR397C	YIL117C	binding enriched	95.439
YDR253C	YPR062W	bound	67.955
YNL216W	YAR009C	-	101.734
YNL314W	YOL016C	+	106.676
YCR084C	YML045W-A	+	42.403
YDR443C	YPL014W	-	111.771
YIL036W	YHR128W	+	69.375
YNL236W	YBL005W-A	+	95.891
YGR252W	YBR139W	binding enriched	50.302
YJL127C	YDR365W-B	-	117.865
YIL101C	YDL195W	binding enriched	78.14
YJL127C	YKL009W	+	82.937
YOR174W	YNR072W	binding enriched	87.996
YLR403W	YKL220C	-	158.654
YLR451W	YIL047C	binding enriched	131.937
YOL004W	YLR413W	+	175.093
YML007W	YPR194C	+	86.2
YDR259C	YNL259C	binding enriched	69.735
YNL236W	YJL138C	+	39.987
YGL071W	YNR050C	+	66.625
YOR229W	YOR273C	-	13.211
YPL254W	YOL058W	-	102.14
YGL181W	YCL020W	+	104.581
YDR253C	YGR271W	+	84.468
YPL254W	YER062C	+	98.167
YBR081C	YOR267C	binding enriched	104.629
YJL127C	YLR060W	+	56.378
YOR110W	YLR308W	binding enriched	157.368
YDL170W	YDL106C	binding enriched	25.884
YNL216W	YBL013W	binding enriched	83.338
YOR174W	YPL246C	binding enriched	88.891
YPL075W	YGL048C	+	99.088
YJL127C	snR72	?	74.829
YDL170W	YOR385W	+	79.892
YPR086W	YMR159C	binding enriched	34.835
YLR071C	YNR068C	binding enriched	61.753
YLR403W	YMR282C	?	94.921
YDR259C	YOR362C	binding enriched	69.405
YIL131C	YHR190W	binding enriched	48.5
YER109C	YGR250C	-	31.221
YPL042C	YML100W	+	37.118
YNL027W	YMR316C-A	+	112.245
YBR081C	YMR042W	binding enriched	64.014
YIL131C	YML063W	binding enriched	79.093
YDL005C	YNL059C	binding enriched	76.098
YNL216W	YNL067W	+	35.576
YDL170W	YLR144C	binding enriched	112.657
YLR403W	YOR261C	?	120.294
YBR083W	YGR149W	+	41.957
YBL054W	YGR138C	-	43.447
YOR028C	YLR464W	+	164.309
YGR104C	YBR072W	binding enriched	24.185
YLR071C	YBR101C	binding enriched	56.581
YNL027W	YOL016C	+	38.594
YDR463W	YGR161W-C	binding enriched	101.415
YGL073W	YDL048C	-	89.28
YMR021C	YCR021C	-	42.51
YOR174W	YJL210W	binding enriched	45.574
YNL236W	YLR158C	-	122.071
YKL032C	YBR083W	+	81.74
YHR058C	YBL043W	binding enriched	41.925
YDR259C	YDR011W	binding enriched	99.131
YNL330C	YMR220W	binding enriched	96.625
YBR112C	YPL016W	binding enriched	85.044
YNL216W	YDL048C	binding enriched	59.255
YDR463W	YNL327W	binding enriched	29.715
YDL005C	YAR035W	binding enriched	50.434
YDL170W	YLR044C	binding enriched	116.209
YER159C	YLR454W	binding enriched	94.347
YLR403W	YPR033C	?	161.098
YDL005C	YMR099C	binding enriched	80.268
YPL075W	YBR205W	+	67.331
YEL009C	YGL089C	?	71.183
YGR252W	YGL080W	binding enriched	50.568
YKL112W	YOR194C	-	45.965
YLR403W	YHL028W	-	168.312
YNL103W	YNL257C	?	29.482
YDR463W	YBR244W	+	90.55
YDR259C	YNL302C	binding enriched	68.097
YER159C	YLR352W	binding enriched	99.409
YBR049C	YIR018W	binding enriched	73.114
YBR049C	YKL072W	binding enriched	95.445
YLR403W	YJR148W	+	134.146
YDR463W	YBR069C	+	92.123
YLR071C	YDR213W	binding enriched	102.229
YJL127C	YOR063W	+	56.872
YDR253C	YML054C	bound	83.749
YCR084C	YFR002W	+	53.247
YPL075W	YGR038C-A	-	77.045
YDL005C	YBR251W	binding enriched	109.333
YPL075W	YBR084C-A	+	42.631
YIL101C	YCR094W	binding enriched	57.837
YLR403W	YGR275W	-	60.215
YKL112W	YKR065C	+	37.688
YIL131C	YLR224W	binding enriched	102.277
YDR463W	YMR140W	binding enriched	81.818
YPR086W	YAL018C	binding enriched	79.413
YOR110W	YDL223C	binding enriched	39.082
YDR259C	YHR194W	binding enriched	85.378
YER159C	YOR134W	binding enriched	74.119
YKR099W	YDR034C-D	-	24.637
YBR083W	YDR261W-A	+	82.503
YDL106C	YDL074C	binding enriched	19.141
YKL058W	YPR036W-A	binding enriched	40.581
YNL216W	YPL080C	binding enriched	95.526
YLR176C	YNR041C	binding enriched	154.137
YIL101C	YJL196C	binding enriched	72.571
YDL170W	YGR019W	binding enriched	120.153
YNL216W	YLR402W	binding enriched	129.804
YLR176C	YGL255W	binding enriched	78.116
YDL005C	YIR012W	binding enriched	21.863
YLR403W	YKL030W	+	182.275
YIL036W	YHR215W	+	79.41
YBR112C	YNL221C	binding enriched	91.916
YNL068C	YPL239W	binding enriched	95.922
YJL127C	YIL053W	+	61.591
YNL216W	YDR261C-C	-	82.801
YBR049C	YEL077C	-	67.428
YDR392W	YOL103W-B	+	79.667
YHR058C	YDR171W	binding enriched	74.693
YDL005C	YBR060C	binding enriched	68.531
YBR049C	YDR411C	binding enriched	112.874
YJL127C	YDL024C	?	75.204
YDR259C	YCL059C	binding enriched	118.916
YCR084C	YFL066C	+	62.256
YOR110W	YGR234W	binding enriched	94.103
YDL005C	YBR216C	binding enriched	107.796
YJL056C	YFL062W	+	51.728
YIL101C	YEL013W	binding enriched	56.859
YLR223C	YLR075W	bound	101.07
YDR463W	YDR298C	binding enriched	36.107
YMR037C	YHR065C	binding enriched	47.472
YKL112W	YMR120C	+	60.893
YOL004W	YHR215W	+	114.326
YEL009C	YAL005C	?	25.554
YOL108C	YJL003W	binding enriched	72.08
YOR230W	YDR508C	binding enriched	49.12
YIL131C	YKR048C	binding enriched	81.294
YNL103W	YPR065W	?	104.807
YIL036W	YHR133C	+	71.058
YDR443C	YER150W	-	50.762
YDR392W	YGR045C	binding enriched	125.685
YGR252W	YPL223C	binding enriched	48.937
YLR403W	YKL119C	?	158.883
YIL131C	YML013W	binding enriched	75.674
YOL148C	YLR452C	+	153.054
YIL101C	YHR151C	binding enriched	51.798
YIL131C	YER088C	binding enriched	24.584
YOR032C	YIR034C	+	48.511
YLR071C	YGR146C	binding enriched	48.394
YER040W	YCR052W	binding enriched	60.045
YJL103C	YOL103W-B	+	32.816
YGL073W	YER055C	+	31.198
YER159C	YCL050C	binding enriched	95.439
YJL127C	YBL087C	+	83.957
YPR104C	YKR092C	binding enriched	39.531
YLR176C	YMR299C	binding enriched	96.95
YPR086W	YDR174W	binding enriched	44.854
YIL101C	YPL240C	binding enriched	69.271
YDR123C	YMR054W	binding enriched	30.494
YIL036W	YDR418W	+	127.304
YPL075W	YBR244W	+	78.467
YDL005C	YLR159C-A	binding enriched	144.292
YCR084C	YIL129C	-	41.07
YOR174W	YEL048C	binding enriched	107.906
YKR099W	YDR316W-B	-	94.686
YGR252W	YDR406W	binding enriched	77.696
YML007W	YGL196W	binding enriched	121.782
YJL127C	YLR004C	?	64.209
YJL127C	YJR094W-A	+	33.523
YDR423C	YER161C	-	64.573
YDR259C	YLR177W	binding enriched	135.392
YDR259C	YFR049W	binding enriched	105.256
YBL103C	YBR005W	+	68.061
YDL005C	YNL090W	binding enriched	98.031
YMR037C	YCR005C	binding enriched	68.175
YLR403W	YCL039W	?	153.485
YLR223C	YGR117C	bound	70.513
YGR252W	YDR231C	binding enriched	77.216
YGR252W	YDR160W	binding enriched	89.541
YCR084C	YIL099W	-	37.378
YBR081C	YPL265W	binding enriched	34.669
YDR253C	YCR048W	bound	89.256
YNL216W	YDL188C	binding enriched	44.408
YLR176C	YOR322C	binding enriched	115.652
YDL056W	YPL014W	-	49.789
YNL216W	YBL003C	+	87.049
YML007W	YDL019C	binding enriched	19.984
YDR259C	YHR050W-A	binding enriched	99.068
YLR403W	YOL031C	?	166.774
YIL101C	YCR030C	binding enriched	36.996
YDL005C	YPL153C	binding enriched	82.773
YLR403W	YBL020W	-	143.343
YDR463W	YGL009C	+	126.136
YJL056C	YIL045W	?	68.468
YDR146C	YMR122W-A	binding enriched	27.147
YBR049C	YJL077C	binding enriched	98.163
YPR086W	YDL125C	binding enriched	46.108
YDR392W	YOR095C	+	68.194
YOR363C	YPL271W	-	80.661
YML007W	YBL027W	binding enriched	39.79
YDR253C	YOR034C	+	83.216
YML007W	YNR009W	+	39.797
YDR259C	YGL047W	binding enriched	123.246
YDR169C	YIL037C	+	118.012
YOR174W	YBR026C	binding enriched	109.774
YLR071C	YDL022W	binding enriched	66.011
YGR252W	YHR115C	binding enriched	79.16
YNL236W	RDN25-1	+	98.353
YOR174W	YHR102W	binding enriched	95.148
YGL181W	YPR123C	+	107.656
YPL075W	YHR046C	-	30.055
YIR018W	YFL016C	?	20.82
YOR110W	YER071C	binding enriched	85.399
YBR049C	YHR008C	binding enriched	56.176
YNL236W	YNL329C	+	49.329
YEL009C	YEL076C-A	?	50.727
YDR259C	YIR041W	binding enriched	124.307
YER161C	YDL048C	-	81.799
YNL330C	YBL079W	binding enriched	94.756
YDR392W	YLR168C	binding enriched	129.344
YPR086W	YDL079C	binding enriched	25.378
YMR037C	YLR312W-A	binding enriched	158.89
YIL036W	YPL048W	+	75.442
YIL101C	YJR150C	binding enriched	49.653
YBR049C	YCL047C	binding enriched	47.939
YJL127C	YDR034C-A	-	88.367
YDL170W	YJL099W	binding enriched	85.308
YIL101C	YHR114W	binding enriched	61.047
YIL036W	YDL037C	+	68.461
YPL075W	YML106W	+	27.253
YML007W	YPR061C	-	58.938
YCR084C	YOL016C	+	64.319
YIL131C	YLR039C	binding enriched	33.767
YDR259C	YNL115C	binding enriched	82.333
YDL106C	YGR204W	+	80.609
YHR206W	YKL096W	-	100.872
YDR259C	YLR158C	binding enriched	125.77
YGL073W	YAL003W	+	95.059
YDR463W	YDR116C	binding enriched	67.146
YLR071C	YGL254W	binding enriched	57.023
YDR146C	YNR008W	binding enriched	111.631
YDR146C	RDN25-1	-	101.52
YOL145C	YPL233W	binding enriched	121.506
YGR252W	YKL192C	binding enriched	89.618
YJL056C	YLR136C	?	87.716
YPR104C	YJL034W	binding enriched	82.181
YKL112W	YGR151C	-	107.328
YBR049C	YAL007C	-	88.845
YIL131C	YJR066W	binding enriched	59.339
YGL166W	YER008C	-	93.014
YDL005C	YLR260W	binding enriched	169.43
YJR140C	YOR317W	+	53.585
YPR086W	YKL192C	binding enriched	49.312
YBR112C	YMR094W	binding enriched	63.284
YIR023W	YBR005W	+	25.118
YJR127C	YLR152C	binding enriched	72.242
YNL216W	YGL124C	binding enriched	49.073
YLR403W	YKL052C	+	166.902
YIL101C	YGL153W	binding enriched	50.785
YGR116W	YOR389W	binding enriched	77.48
YJL127C	YOL013W-A	?	68.29
YLR403W	YJR070C	+	149.938
YDL005C	YIL046W-A	binding enriched	53.269
YDL106C	YMR300C	+	65.527
YDR253C	YLR266C	bound	127.549
YOL148C	YOL143C	+	2.929
YLR403W	YGL071W	?	100.553
YNL236W	YBR263W	+	95.303
YPR086W	YLL041C	binding enriched	80.186
YPR104C	YJL107C	binding enriched	90.561
YOL148C	YKL080W	+	61.305
YPL075W	YGR268C	+	100.884
YGR104C	YHR108W	binding enriched	52.175
YBR049C	YFR023W	binding enriched	92.904
YHR058C	YGR222W	binding enriched	82.301
YJL127C	YNR076W	-	23.345
YLR403W	YAR075W	+	191.738
YGR116W	YDR003W-A	binding enriched	87.333
YER159C	YGR023W	binding enriched	90.077
YDR259C	YBR129C	binding enriched	85.842
YDR463W	YGR256W	binding enriched	71.284
YLR071C	YBR179C	binding enriched	64.153
YCR084C	YML115C	+	42.168
YDR421W	YGR166W	-	88.632
YBR049C	YNL135C	binding enriched	96.348
YNL103W	YJR137C	?	34.16
YKL185W	YIL046W	binding enriched	101.293
YLR403W	YPL157W	?	111.229
YLR223C	YER102W	bound	103.323
YOL004W	YOR209C	+	103.247
YML007W	YOR174W	binding enriched	118.245
YBR049C	YOR138C	binding enriched	114.186
YDL005C	YLR378C	binding enriched	173.299
YJL127C	YNL165W	?	39.892
YDR259C	YPL281C	binding enriched	79.671
YDL005C	YCR071C	binding enriched	62.754
YNL236W	YKL036C	+	68.986
YOR230W	YJR009C	binding enriched	105.845
YNL236W	YNL287W	+	29.935
YIL131C	YLR389C	binding enriched	107.045
YNL236W	YMR046C	+	76.65
YOR344C	YHR136C	-	121.465
YPR086W	YKL037W	binding enriched	52.715
YIL036W	YPL131W	+	82.9
YIL101C	YKR069W	binding enriched	75.917
YIR018W	YPL174C	binding enriched	92.403
YIL036W	YMR046C	+	86.045
YIL131C	YJR139C	binding enriched	51.554
YDR253C	YKL201C	bound	42.545
YLR403W	YLR093C	-	110.654
YLR071C	YJR152W	binding enriched	88.451
YMR164C	YOR032C	?	91.01
YOR174W	YNL275W	binding enriched	29.602
YLR403W	YOR390W	?	87.357
YOR344C	YCL018W	+	143.472
YNL103W	YER019C-A	?	62.304
YAL051W	YPR176C	+	88.32
YOL148C	YDR276C	+	98.605
YER040W	YJR108W	binding enriched	26.267
YLR403W	YHL040C	?	152.874
YIL101C	YPR069C	binding enriched	68.665
YLR403W	YNR053C	+	155.608
YBR049C	YPL011C	binding enriched	67.211
YNL330C	YOR196C	binding enriched	29.308
YKL112W	YBR154C	-	79.561
YIL131C	YHR101C	binding enriched	59.127
YDL106C	YBR296C	+	101.572
YLR403W	YKL096W	-	163.728
YPL075W	YBL092W	+	75.534
YKL112W	YBR155W	-	79.573
YIL036W	YER165W	+	78.584
YOR110W	YMR119W	binding enriched	82.473
YLR403W	YGR063C	-	97.525
YBR049C	YML043C	binding enriched	45.61
YBR083W	YHL021C	+	58.906
YLR403W	YPL051W	-	160.287
YAL051W	YMR316W	+	112.074
YER159C	YGR035C	binding enriched	80.727
YNL216W	YHR070W	binding enriched	84.566
YLR403W	YBL077W	+	107.182
YLR055C	YCR093W	binding enriched	61.66
YDL170W	YGR200C	binding enriched	81.407
YPL254W	YIL138C	-	81.975
YIL131C	YGR214W	binding enriched	49.056
YCR081W	YMR250W	-	76.329
YPL075W	YPL131W	+	34.347
YDR207C	YCL037C	binding enriched	119.472
YLR131C	YBR122C	-	56.346
YHR058C	YER058W	binding enriched	91.751
YKL185W	YJL004C	binding enriched	84.356
YLR403W	YGR235C	-	63.862
YOL148C	YER165W	+	62.2
YNL236W	YPR041W	+	82.184
YDR259C	YLR460C	binding enriched	122.315
YBR279W	YOR094W	binding enriched	112.947
YDR423C	YGR239C	-	60.984
YNL309W	YHL047C	-	125.836
YDR259C	YGR105W	binding enriched	99.599
YPR104C	YDR188W	binding enriched	48.735
YPR104C	YMR295C	binding enriched	59.814
YDR259C	YER109C	binding enriched	80.137
YGR116W	YPR158W	binding enriched	105.095
YOR110W	YKL170W	binding enriched	18.545
YBR049C	YBL078C	binding enriched	25.109
YIL101C	YOL054W	binding enriched	50.323
YCR084C	YHR022C	-	27.426
YGL073W	YBR092C	+	57.641
YDR392W	YBR066C	binding enriched	99.738
YGR104C	YML027W	binding enriched	80.408
YLR403W	YIL104C	?	117.471
YNL236W	YIL033C	+	88.22
YIR018W	YLR363C	?	169.627
YJL127C	YBR012W-A	-	81.654
YOR110W	YMR040W	binding enriched	73.338
YIR018W	YJR117W	binding enriched	68.737
YIL131C	YBL102W	binding enriched	39.871
YIL131C	YBR273C	binding enriched	61.944
YBR112C	YPR009W	binding enriched	87.572
YPL254W	YJL194W	binding enriched	117.313
YBR049C	YMR170C	-	68.011
YLR403W	YMR308C	+	97.065
YLR403W	YJR155W	-	148.062
YDL005C	YAL021C	binding enriched	18.529
YLR403W	YDL131W	?	148.646
YDR207C	YAR073W	binding enriched	149.93
YLR403W	YPL155C	?	111.785
YDR253C	YDL079C	bound	50.554
YIL131C	YPL105C	binding enriched	78.334
YDR259C	YJL189W	binding enriched	98.826
YDR253C	YBL029W	bound	100.974
YOR174W	YDL144C	binding enriched	39.858
YOR110W	YGL244W	binding enriched	89.151
YNL330C	YLR080W	binding enriched	97.841
YDR392W	YPR145W	binding enriched	82.846
YBR049C	YBR299W	binding enriched	69.903
YDR146C	YDR444W	-	38.94
YOR174W	YNL300W	binding enriched	15.815
YNL103W	YNL144C	?	13.046
YNL216W	YJR015W	+	64.807
YDL005C	YDL174C	binding enriched	97.738
YLR403W	YOR312C	+	108.611
YLR403W	YLR112W	-	100.292
YDR259C	YLL049W	binding enriched	108.238
YOR174W	YFL007W	binding enriched	115.871
YOR110W	YOR194C	binding enriched	29.001
YLR176C	YFR048W	binding enriched	169.27
YLR176C	YNL318C	binding enriched	129.716
YOR032C	YHR072W-A	-	72.915
YGR252W	YLR163C	binding enriched	56.134
YDR463W	YKL197C	binding enriched	52.257
YOR110W	YNL077W	binding enriched	70.088
YPR086W	YBR111C	binding enriched	64.066
YDR253C	YOR316C	bound	60.05
YOR174W	YLR057W	binding enriched	102.357
YOR110W	YKL023W	binding enriched	77.503
YDR259C	YNL110C	binding enriched	88.036
YIL101C	YBL042C	binding enriched	45.994
YBR081C	YPL239W	binding enriched	41.426
YGL073W	YJL008C	+	79.429
YNL216W	YDL083C	binding enriched	58.683
YIL036W	YOL150C	-	92.67
YLR176C	YJL204C	binding enriched	123.126
YHR206W	YGR161W-C	binding enriched	33.959
YOL148C	YER138C	+	58.971
YOR174W	YER088C	binding enriched	59.74
YJL127C	YMR186W	+	115.035
YLR403W	YCR068W	+	123.981
YJL127C	YKR009C	?	83.612
YDR259C	YJL094C	binding enriched	114.163
YIL101C	YGR109C	binding enriched	40.717
YCR084C	YGR123C	+	50.994
YKR099W	YNL054W-A	-	85.14
YLR403W	YLL003W	-	173.484
YJL056C	YER061C	binding enriched	46.807
YOR110W	YFR013W	binding enriched	88.369
YLR403W	YOL012C	-	169.24
YLR403W	YBR287W	+	71.868
YBR049C	YOR021C	binding enriched	93.787
YLR403W	YGR148C	?	70.482
YIL131C	YHR041C	binding enriched	61.118
YER159C	YPL186C	binding enriched	59.084
YBR081C	YER150W	binding enriched	55.42
YDR423C	YNL103W	-	80.971
YML007W	YGR102C	binding enriched	90.346
YOR174W	YGR062C	binding enriched	105.67
YOR110W	YBL054W	binding enriched	104.576
YJR127C	YKL016C	binding enriched	61.138
YER161C	YBR033W	binding enriched	89.427
YJL127C	YNL066W	+	13.373
YML099C	YGR271W	-	87.79
YDR397C	YBR161W	binding enriched	82.644
YDR043C	YOL014W	+	63.657
YNL199C	YFL002W-B	-	82.281
YIR018W	YMR025W	?	56.305
YML007W	YOR182C	binding enriched	114.724
YLR403W	YML122C	?	126.71
YDL170W	YDR471W	binding enriched	46.174
YLR176C	YPR015C	-	164.222
YDR207C	YMR266W	binding enriched	42.991
YOL148C	YOL158C	+	9.209
YNL236W	YGR094W	+	88.749
YEL009C	YBL048W	?	62.897
YOR110W	YGR175C	binding enriched	113.319
YJL127C	YLR405W	+	133.053
YNL216W	YLR061W	+	76.382
YOR110W	YDR158W	binding enriched	74.378
YJL110C	YHR215W	-	114.165
YLR403W	YJR123W	+	130.637
YHR058C	YAR007C	binding enriched	97.523
YOR110W	YGR082W	binding enriched	107.613
YNL103W	YGR146C	?	77.785
YER159C	YNL037C	binding enriched	72.132
YOL148C	YDR210W-B	+	99.691
YLR071C	YJL030W	binding enriched	67.052
YIL036W	YLR185W	+	122.58
YNL199C	YOR344C	-	67.721
YDR259C	YLR386W	binding enriched	127.365
YOL004W	YDR341C	+	129.96
YBR049C	YOR311C	binding enriched	113.934
YLR176C	YKR058W	binding enriched	179.433
YPR104C	YMR031C	binding enriched	30.497
YDL020C	YER056C	+	68.448
YDL005C	YNR032W	binding enriched	55.417
YLR403W	YPL263C	?	102.202
YNL103W	YGR155W	?	88.871
YPL254W	YNL054W-A	+	109.808
YPR086W	YBR126C	binding enriched	61.452
YIL131C	YNR003C	binding enriched	71.756
YPR104C	YER011W	binding enriched	101.693
YBR049C	YPR054W	binding enriched	56.721
YIL101C	YLR215C	binding enriched	112.113
YJL127C	YDR261C-D	-	117.946
YBR049C	YHR215W	+	39.278
YLR403W	YOR244W	-	118.034
YPL254W	YOR342C	+	100.175
YDR253C	YPR035W	bound	73.767
YGR252W	YIL029C	binding enriched	93.301
YIL131C	YMR090W	binding enriched	76.052
YGL035C	YLR194C	+	119.418
YLR418C	YGR259C	+	63.224
YPR104C	YFL024C	binding enriched	75.088
YPL248C	YOL084W	+	79.43
YLR451W	YLR046C	binding enriched	124.027
YGR252W	YER035W	binding enriched	76.494
YIL101C	YPR084W	binding enriched	63.629
YDL170W	YDR150W	binding enriched	42.949
YIL131C	YNR036C	binding enriched	61.431
YLR223C	YPL143W	bound	106.215
YGR104C	YMR056C	binding enriched	92.265
YNL330C	YFL007W	binding enriched	129.585
YBR081C	YHR007C-A	binding enriched	62.993
YOR363C	YCR021C	+	112.51
YLR071C	YOR227W	binding enriched	117.523
YBR049C	YPL241C	binding enriched	51.78
YDR259C	YGR059W	binding enriched	118.557
YOR110W	YOL103W	binding enriched	17.641
YDR392W	YKR042W	+	105.585
YPL075W	YDR502C	+	79.915
YHR178W	YBR296C	-	47.821
YLR071C	YPL170W	binding enriched	71.481
YDR207C	YLR157C-B	+	124.973
YLR403W	YLR156W	-	46.445
YLR055C	YGR210C	binding enriched	65.924
YBR049C	YKL068W-A	binding enriched	89.296
YLR176C	YLR343W	binding enriched	36.637
YDR259C	YGR215W	binding enriched	76.241
YLR403W	YHR111W	?	126.415
YBR240C	YBR009C	-	94.313
YIL101C	YBL093C	binding enriched	48.23
YDL170W	YKL168C	binding enriched	27.333
YOL148C	YML039W	+	110.007
YJL127C	YIL169C	-	38.267
YBR049C	YGR130C	binding enriched	49.509
YIL101C	YER093C-A	binding enriched	22.128
YPL075W	YLR304C	+	139.664
YDR259C	YGR013W	binding enriched	125.417
YMR037C	YFR004W	binding enriched	59.511
YDL005C	YHR010W	binding enriched	16.507
YER111C	YNL289W	+	55.491
YIL131C	YBL066C	binding enriched	30.13
YPL075W	tQ(UUG)B	+	49.736
YDR253C	YHR183W	bound	67.332
YNL199C	YDR050C	+	75.881
YGR252W	YKR037C	binding enriched	114.191
YDR207C	YLR159C-A	binding enriched	130.462
YLR451W	YKL030W	+	180.112
YDR392W	YKR093W	binding enriched	93.301
YOR028C	YJL159W	binding enriched	67.519
YCR084C	YJR028W	+	83.965
YPL254W	YDR225W	+	50.89
YDL005C	YPR100W	binding enriched	68.714
YNL103W	YHR083W	?	99.07
YBR049C	YBR171W	binding enriched	42.058
YNL103W	YNL104C	?	1.767
YPR104C	YNL339C	binding enriched	105.945
YHR084W	YNL159C	+	92.796
YBR049C	YGR085C	+	45.255
YIL036W	YOL109W	+	93.179
YDR259C	YOR264W	binding enriched	83.015
YGL073W	YNL162W	+	60.415
YPR086W	YDL197C	binding enriched	62.109
YGR116W	YOR134W	binding enriched	114.047
YDR392W	YBL033C	binding enriched	120.193
YDL005C	YMR138W	binding enriched	92.358
YIL101C	YPR098C	binding enriched	65.975
YCR084C	YBR244W	+	63.356
YBR049C	YIL158W	+	72.692
YIR018W	YJL131C	?	79.011
YNL216W	YBR106W	+	93.733
YJL127C	YBR023C	?	82.955
YEL009C	YNL277W	?	99.54
YLR403W	YDL047W	+	156.771
YER159C	YLR116W	binding enriched	57.612
YLR403W	YKL214C	?	147.674
YOR298C-A	YGR138C	-	68.71
YOR298C-A	YLR297W	-	117.187
YBR279W	YKL124W	binding enriched	119.584
YNL236W	YHR218W	+	135.341
YDL005C	YGR146C-A	binding enriched	103.295
YHR058C	YER020W	binding enriched	82.688
YKL032C	YGR044C	-	99.397
YOR110W	YDL148C	binding enriched	32.138
YDR451C	YDR034C-A	+	84.196
YNL103W	YEL046C	?	66.256
YIL101C	YML028W	binding enriched	55.346
YJL127C	YFR030W	?	91.7
YGL073W	YER103W	+	33.013
YLR098C	YCR096C	binding enriched	56.337
YLR403W	YER162C	-	91.937
YIL131C	YJL100W	binding enriched	51.132
YIR018W	YHR011W	?	26.992
YER159C	YPL014W	binding enriched	103.48
YIL131C	YPR164W	binding enriched	88.432
YDL005C	YMR208W	binding enriched	114.607
YIL131C	YLR017W	binding enriched	47.722
YGR104C	YBR077C	binding enriched	22.496
YPR104C	YKR080W	binding enriched	49.094
YLR403W	YDR368W	-	107.43
YDR259C	YNR045W	binding enriched	132.384
YOR174W	YNL234W	binding enriched	34.328
YJL056C	YDR492W	+	94.988
YPL254W	YNL219C	binding enriched	87.486
YDL005C	YLR298C	binding enriched	173.145
YDR463W	YGR121W-A	binding enriched	90.884
YDR423C	YNR033W	-	121.204
YNL330C	YHR060W	binding enriched	114.766
YDL170W	YCR073C	binding enriched	112.862
YML007W	YIL017C	binding enriched	30.732
YMR164C	YJL076W	-	111.525
YOR174W	YML013W	binding enriched	116.2
YLR176C	YCR039C	binding enriched	114.951
YOL004W	YLR029C	+	51.118
YDR463W	YKL096W	+	77.922
YDR253C	YKL001C	bound	117.118
YJL056C	YDR253C	?	104.058
YLR403W	YOR181W	+	130.089
YIL101C	YML052W	binding enriched	72.369
YOR174W	YHL025W	binding enriched	122.163
YGR116W	YLL040C	binding enriched	64.25
YGR116W	YFR053C	binding enriched	109.13
YDR207C	YDR118W	binding enriched	29.692
YPR086W	YFR050C	binding enriched	59.977
YPL075W	YGL062W	-	88.395
YBR081C	YBR049C	binding enriched	22.558
YDL005C	YOL126C	binding enriched	88.01
YKR099W	YPL197C	+	68.669
YIL131C	YDL103C	binding enriched	80.594
YOR110W	YPL048W	binding enriched	105.039
YBR049C	YBR002C	binding enriched	62.479
YLR176C	YDR388W	binding enriched	124.472
YOR174W	YHL015W-A	binding enriched	118.909
YDR392W	YNL136W	binding enriched	75.664
YER159C	YBL100W-C	binding enriched	75.134
YDL170W	YPR196W	binding enriched	56.936
YER159C	YNL193W	binding enriched	44.204
YIL101C	YGR254W	binding enriched	57.51
YDL005C	YCL064C	binding enriched	49.83
YNL216W	YGR034W	+	91.678
YOR110W	YGR146C-A	binding enriched	105.744
YPR086W	YOR040W	binding enriched	59.684
YJL127C	YOR216C	?	69.874
YPL075W	YDR500C	+	78.591
YPL075W	YLR339C	+	127.62
YDR207C	YMR096W	-	40.799
YOR110W	YCR095W-A	binding enriched	119.53
YLR403W	YOL121C	+	135.41
YDR259C	YBR256C	binding enriched	79.681
YCR084C	YLR466W	+	128.35
YOR230W	YCR012W	binding enriched	139.27
YOR110W	YBR156C	binding enriched	91.146
YGL073W	YOR020C	+	88.689
YPR133C	YER061C	binding enriched	108.545
YDR253C	YMR251W-A	bound	39.188
YIL101C	YDL065C	binding enriched	63.386
YER161C	YCL040W	-	96.063
YJL127C	YKL061W	?	74.218
YJL127C	YLR271W	?	133.896
YEL009C	YOR045W	?	64.781
YER159C	YMR181C	binding enriched	90.297
YDR259C	YGR240C-A	binding enriched	71.077
YJL127C	YCL009C	+	95.396
YNL216W	YMR242C	+	86.959
YDR392W	YDL173W	binding enriched	45.713
YMR037C	YJL131C	binding enriched	94.645
YCR084C	YLR327C	-	119.347
YNL309W	YOL158C	-	54.973
YDR392W	YMR058W	binding enriched	82.986
YPL177C	YOL155C	+	102.063
YMR037C	YLR224W	binding enriched	158.941
YER111C	YKL096W-A	+	79.716
YIL131C	YER144C	binding enriched	40.439
YHR041C	YLR158C	-	112.75
YOL004W	YHR128W	+	82.554
YNL103W	YOR162C	?	66.349
YBL103C	YLR194C	+	87.867
YJL056C	YPL241C	binding enriched	115.595
YOR110W	YDL130W	binding enriched	33.67
YML007W	YEL054C	binding enriched	68.468
YOR363C	YNL070W	-	57.187
YNL330C	YPL137C	binding enriched	74.925
YER111C	YGR043C	binding enriched	47.504
YLR403W	YJL079C	-	146.845
YNL330C	YPL163C	binding enriched	69.564
YLR176C	YML008C	binding enriched	160.551
YJL127C	YNR051C	?	29.876
YNL229C	YIR016W	binding enriched	89.341
YHR178W	YKL178C	+	97.895
YLR403W	YER119C	+	84.264
YOR174W	YDR089W	binding enriched	56.929
YDR253C	YPL068C	bound	74.428
YDR463W	YEL015W	binding enriched	136.825
YBR049C	YER146W	binding enriched	79.78
YKL185W	YDL055C	binding enriched	34.714
YNL216W	YKL181W	binding enriched	48.167
YOR174W	YFR031C-A	binding enriched	102.484
YDR392W	YNL293W	binding enriched	54.85
YLR071C	YIL053W	binding enriched	8.935
YGR116W	YPL055C	binding enriched	84.26
YOR110W	YFR017C	binding enriched	87.699
YDR207C	YGL096W	binding enriched	106.118
YOR032C	YOR293W	-	84.149
YER040W	YCR043C	binding enriched	58.401
YPL075W	YKL096W	+	76.309
YLR223C	YPL079W	bound	135.117
YNL216W	YNL302C	+	30.138
YDR423C	YOR262W	-	62.532
YOR110W	YPR097W	binding enriched	78.828
YER159C	YBR183W	binding enriched	64.343
YLR403W	YJR096W	-	140.511
YER111C	YNL115C	binding enriched	37.278
YBR112C	YDR427W	binding enriched	94.634
YER159C	YOR007C	binding enriched	99.116
YDR463W	YER049W	binding enriched	94.368
YDL005C	YBR138C	binding enriched	98.591
YER159C	YOR194C	binding enriched	50.551
YER169W	YLR174W	binding enriched	86.705
YGR252W	YKL207W	binding enriched	77.54
YBR049C	YHR183W	+	25.538
YKL112W	YBR092C	+	85.629
YDL170W	YNL326C	binding enriched	62.804
YML007W	YDR452W	binding enriched	124.253
YDR207C	YOR349W	binding enriched	95.758
YNL216W	YKL164C	+	35.27
YJL056C	YGR279C	?	101.882
YIL036W	YFL031W	+	47.849
YOL004W	YOL109W	+	72.305
YLR403W	YBR133C	-	95.662
YJR127C	YNL213C	binding enriched	28.057
YCR084C	YPL257W-A	+	63.458
YDR259C	YER021W	binding enriched	120.342
YIL101C	YJR039W	binding enriched	48.226
YLR403W	YIL169C	-	114.01
YML007W	YJR076C	binding enriched	75.722
YDR207C	YGR177C	binding enriched	97.809
YGR252W	YGR254W	binding enriched	2.949
YDR463W	YBR255C-A	binding enriched	78.879
YCR084C	YML107C	+	44.74
YOR174W	YBR126C	binding enriched	104.743
YLR176C	YOR382W	-	93.009
YOR174W	YHR206W	binding enriched	107.32
YLR403W	YBR291C	?	71.472
YPR104C	YDR385W	binding enriched	85.249
YDR259C	YDL234C	binding enriched	42.907
YOR174W	YLR193C	binding enriched	140.203
YIL101C	YKL013C	binding enriched	57.653
YGR116W	YOL032W	binding enriched	100.553
YNL236W	YDR098C-B	+	68.036
YCR084C	YMR046C	+	60.584
YPR086W	YGR254W	binding enriched	91.07
[truncated: 26,261 more rows]
